# Supplementary material for: High-Conductive Multilayer TiOX-Ti3C2TX Electrocatalyst for Longevous Metal-Oxygen Battery under a High Rate
Source: MDPI journal article supplement (doi:10.3390/batteries9040205), 2023-03-30
Supplement: s1 [file s1]

# High-Conductive Multilayer $\text{TiO}_x\text{-Ti}_3\text{C}_2\text{T}_x$ Electrocatalyst for Longevous Metal-Oxygen Battery under a High Rate

Zhihui Sun, Shuai Zhao \*, Jixiong Zhang \*

School of Mines, China University of Mining and Technology, Xuzhou 221116, China

\* Correspondence: Zhaoshuai6074@cumt.edu.cn (S.Z.); zjxiong@163.com (J.Z.)

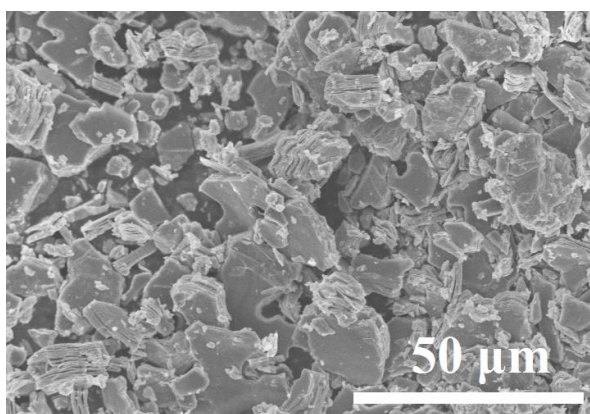

**Figure S1.** SEM image of  $\text{TiO}_x\text{-Ti}_3\text{C}_2\text{T}_x$ .

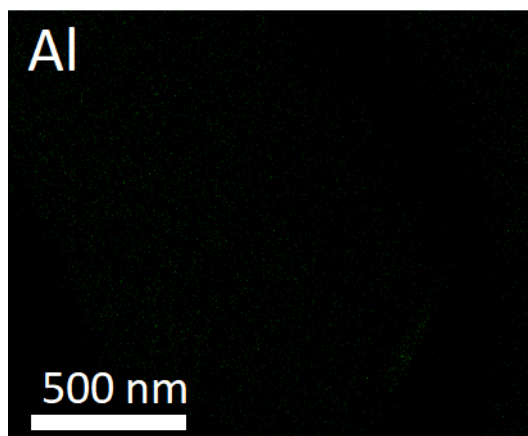

**Figure S2.** EDS mapping images of Al element for  $\text{TiO}_x\text{-Ti}_3\text{C}_2\text{T}_x$ .

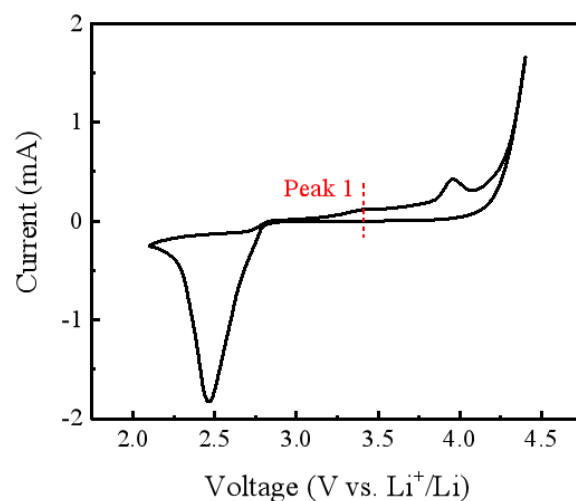

**Figure S3.** cyclic voltammetry (CV) curves of  $\text{TiO}_x@\text{Ti}_3\text{C}_2\text{T}_x$ .

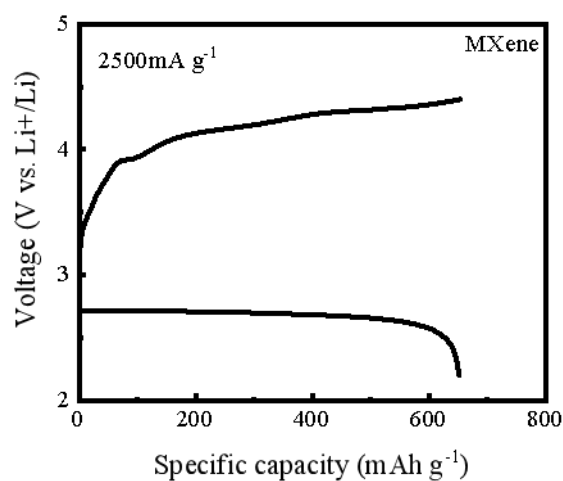

**Figure S4.** Initial full discharge/charge curves of  $\text{TiO}_x\text{-Ti}_3\text{C}_2\text{T}_x$  based LOBs at  $2500 \text{ mA g}^{-1}$  (The specific capacities are normalized by the weight of actual whole electrodes).

**Table S1.** EDS elemental analysis of TiO<sub>x</sub>-Ti<sub>3</sub>C<sub>2</sub>T<sub>x</sub>.

| Element | Weight % | Atomic % | Net Error%□C K |
|---------|----------|----------|----------------|
| C       | 19.52    | 42.13    | 0.85           |
| O       | 12.61    | 20.20    | 1.72           |
| Al      | 1.04     | 0.98     | 3.98           |
| Ti      | 67.83    | 36.69    | 0.57           |

**Table S2.** Comparison of battery performance of TiO<sub>x</sub>-Ti<sub>3</sub>C<sub>2</sub>T<sub>x</sub> based electrode with other reported electrodes.

| Material                                                          | Current density         | First discharge capacity   | Cycling current density | Cycle number | Limited capacity         | Rf. |
|-------------------------------------------------------------------|-------------------------|----------------------------|-------------------------|--------------|--------------------------|-----|
| V-TiO <sub>2</sub> /Ti <sub>3</sub> C <sub>2</sub> T <sub>x</sub> | 100 mA g <sup>-1</sup>  | 11 487 mAh g <sup>-1</sup> | 100 mA g <sup>-1</sup>  | 200          | 1000 mAh g <sup>-1</sup> | [1] |
| N-TiO <sub>2</sub> /Ti <sub>3</sub> C <sub>2</sub> T <sub>x</sub> | 100 mA g <sup>-1</sup>  | 10122 mAh g <sup>-1</sup>  | 500 mA g <sup>-1</sup>  | 200          | 500 mAh g <sup>-1</sup>  | [2] |
| MoO <sub>2</sub> /Mo <sub>2</sub> C@RGO                           | 100 mA g <sup>-1</sup>  | 2365 mAh g <sup>-1</sup>   | 200 mA g <sup>-1</sup>  | 100          | 1000 mAh g <sup>-1</sup> | [3] |
| MoO <sub>2</sub> NPs/CTs                                          | 0.2 mA cm <sup>-2</sup> | 9.3 mAh cm <sup>-2</sup>   | 0.2 mA cm <sup>-2</sup> | 240          | 0.4 mA cm <sup>-2</sup>  | [4] |
| MnCo <sub>2</sub> O <sub>4</sub> /MoO <sub>2</sub> @Ni            | 200 mA g <sup>-1</sup>  | 4210 mAh g <sup>-1</sup>   | 500 mA g <sup>-1</sup>  | 400          | 1000 mAh g <sup>-1</sup> | [5] |
| TiO <sub>x</sub> -Ti <sub>3</sub> C <sub>2</sub> T <sub>x</sub>   | 2500 mA g <sup>-1</sup> | 7169 mAh g <sup>-1</sup>   | 2500 mA g <sup>-1</sup> | 100          | 1000 mAh g <sup>-1</sup> |     |

## References

- [1] Zheng R., Shu C., Hou Z., Hu A., Hei P., Yang T., Li J., Liang R., Long J., In Situ Fabricating Oxygen Vacancy-Rich TiO<sub>2</sub> Nanoparticles via Utilizing Thermodynamically Metastable Ti Atoms on Ti<sub>3</sub>C<sub>2</sub>T<sub>x</sub> MXene Nanosheet Surface To Boost Electrocatalytic Activity for High-Performance Li–O<sub>2</sub> Batteries, *ACS Appl. Mater. Interfaces*, **2019**, 11, 50, 46696–46704.  
<https://doi.org/10.1021/acsami.9b14783>
- [2] Zheng X., Yuan M., Guo D., Wen C., Li X., Huang X., Li H., Sun G., Theoretical

Design and Structural Modulation of a Surface-Functionalized  $\text{Ti}_3\text{C}_2\text{T}_x$  MXene-Based Heterojunction Electrocatalyst for a Li–Oxygen Battery, *ACS Nano*, **2022**, 16, 3, 4487–4499. <https://doi.org/10.1021/acsnano.1c10890>

- [3] Lu Y., Ang H., Yan Q., Fong E., Bioinspired Synthesis of Hierarchically Porous  $\text{MoO}_2/\text{Mo}_2\text{C}$  Nanocrystal Decorated N-Doped Carbon Foam for Lithium–Oxygen Batteries, *Chem. Mater.*, **2016**, 28, 5743-5752. <https://doi.org/10.1021/acs.chemmater.6b01966>
- [4] Liu J., Li D., Wang Y., Zhang S., Kang Z., Xie H., Sun L.,  $\text{MoO}_2$  nanoparticles/carbon textiles cathode for high performance flexible Li- $\text{O}_2$  battery, *J. Energy Chem.*, **2020**, 47, 66-71. <https://doi.org/10.1016/j.jechem.2019.12.001>
- [5] Cao X., Sun Z., Zheng X., Jin C., Tian J., Li X., Yang R.,  $\text{MnCo}_2\text{O}_4/\text{MoO}_2$  Nanosheets Grown on Ni foam as Carbon- and Binder-Free Cathode for Lithium–Oxygen Batteries, *ChemSusChem*, **2018**, 11, 574-579. <https://doi.org/10.1002/cssc.201702240>
